# Supplementary material for: Impacts of Various Connectivity Processes in Central Asia on Sustainable Development of Kyrgyzstan
Source: MDPI journal article supplement (doi:10.3390/su14126998), 2022-06-08
Supplement: s1 [file s1]

# Questionnaire

Please answer as many questions as possible; if any question is outside your area of expertise and you prefer not to answer it, go to the next question

Everywhere you are asked to rate a factor on a scale of 1 to 10,  
1 means the minimum value, 10 means the maximum value

1) In your opinion, what is the current level of development of Kyrgyzstan's economic and industrial integration with international partners from different countries? With which countries is there a real prospect of significantly increasing cooperation over the next five years?

| Countries                                 | Levenl of development today (1-10) | Perspectives for the next five years (1-10) |
|-------------------------------------------|------------------------------------|---------------------------------------------|
| Countries of the Eurasian Economic Union: |                                    |                                             |
| Russia                                    |                                    |                                             |
| Kazakhstan                                |                                    |                                             |
| Belarus                                   |                                    |                                             |
| Armenia                                   |                                    |                                             |
| The region                                |                                    |                                             |
| Countries of Central Asian region:        |                                    |                                             |
| Uzbekistan                                |                                    |                                             |
| Tajikistan                                |                                    |                                             |
| Turkmenistan                              |                                    |                                             |
| China                                     |                                    |                                             |
| India                                     |                                    |                                             |
| Other Asian countries:                    |                                    |                                             |
| South Korea                               |                                    |                                             |
| Japan                                     |                                    |                                             |
| Vietnam                                   |                                    |                                             |
| Others                                    |                                    |                                             |
| Countries of the European Union           |                                    |                                             |
| Germany                                   |                                    |                                             |
| Netherlands                               |                                    |                                             |
| Cyprus                                    |                                    |                                             |
| Other                                     |                                    |                                             |
| Regional                                  |                                    |                                             |

|                                               |  |  |
|-----------------------------------------------|--|--|
| Countries of the Eastern-European partnership |  |  |
| Ukraine                                       |  |  |
| Moldova                                       |  |  |
| Georgia                                       |  |  |
| Azerbaijan                                    |  |  |
| Other European countries                      |  |  |
| Switzerland                                   |  |  |
| Norway                                        |  |  |
| Other                                         |  |  |
| USA                                           |  |  |
| Countries of the Middle East                  |  |  |
| Turkey                                        |  |  |
| Iran                                          |  |  |
| United Arab Emirates                          |  |  |
| Others                                        |  |  |

2) What forms of international capital attraction from the EAEU, EU, China and other countries to Kyrgyzstan can be most realistic and effective for accelerating the country's economic growth in 2018-2023?

| <b>International financial cooperation</b>                                                                                                                                              | <b>Level (or 1-10)</b> | <b>Efficiency (or 1-10)</b> |
|-----------------------------------------------------------------------------------------------------------------------------------------------------------------------------------------|------------------------|-----------------------------|
| Creation of new and development of existing joint development funds with neighboring states and key partners (Russian-Kyrgyz Development Fund, etc.)                                    |                        |                             |
| Participation in development bank projects (World Bank, Eurasian Development Bank, New Development Bank of BRICS, Asian Infrastructure Investment Bank, Islamic Development Bank, etc.) |                        |                             |
| Mobilization of resources from international partners to develop financial institutions                                                                                                 |                        |                             |
| Creation and development of joint ventures                                                                                                                                              |                        |                             |
| Creation and development of transnational corporations                                                                                                                                  |                        |                             |
| Development of leasing and franchising                                                                                                                                                  |                        |                             |
| Mobilization of national and foreign donors                                                                                                                                             |                        |                             |
| Increasing the share of foreign investment in the PPP market                                                                                                                            |                        |                             |
| Participation in the New Silk Road project                                                                                                                                              |                        |                             |
| Participation in Chinese investment projects                                                                                                                                            |                        |                             |
| Participation in EEU investment projects                                                                                                                                                |                        |                             |
| Participation in EU investment projects                                                                                                                                                 |                        |                             |
| Participation in investment projects of other countries and unions                                                                                                                      |                        |                             |
| Others (describe)                                                                                                                                                                       |                        |                             |

3) What financial instruments will contribute to Kyrgyzstan's economic development, increase the level of competitiveness of its producers in international markets and increase its investment attractiveness, including within the framework of its membership in the EAEU, in 2018-2023?

| <b>Types of financial mechanisms</b>                                                | <b>Level of influence (1-10)</b> |
|-------------------------------------------------------------------------------------|----------------------------------|
| Development of the credit system                                                    |                                  |
| Development of a system of internal borrowing                                       |                                  |
| Development of a system of external borrowings                                      |                                  |
| Development of concession mechanisms                                                |                                  |
| Development of public-private partnership mechanisms                                |                                  |
| Development of the securities market                                                |                                  |
| Reduced interest rates                                                              |                                  |
| Development of the insurance market                                                 |                                  |
| Development of financial market instruments                                         |                                  |
| Introduction of new payment systems, including those based on blockchain technology |                                  |
| Development of investment guarantee systems for foreign partners                    |                                  |
| Development of mechanisms of foreign economic relations                             |                                  |
| Other (describe)                                                                    |                                  |

4) What non-financial instruments of support for exporters will help increase the level of competitiveness of Kyrgyzstan and increase its investment attractiveness, including within the framework of the EAEU international legal system, in 2018-2023?

| Characteristics of tools to support exporters | Description                                                                                                                                                    | Degree of influence (1-10) |
|-----------------------------------------------|----------------------------------------------------------------------------------------------------------------------------------------------------------------|----------------------------|
| Customs regulation                            | Unified commodity nomenclature of foreign economic activity of the Eurasian Economic Union                                                                     |                            |
|                                               | Single Customs Tariff of the Eurasian Economic Union                                                                                                           |                            |
|                                               | Uniform rules for determining the country of origin                                                                                                            |                            |
| Technical regulation                          | Technical regulations, quality standards                                                                                                                       |                            |
|                                               | Processes of convergence of technical regulation of EAEU countries both inside and outside the union                                                           |                            |
|                                               | Bringing technical regulations in line with international standards                                                                                            |                            |
| Sanitary and phytosanitary regulation         | Laws, regulations, rules, requirements, and procedures covering, among other things, end product requirements                                                  |                            |
|                                               | Processing and production methods                                                                                                                              |                            |
|                                               | Quarantine regulations, including appropriate requirements related to the transport of animals, plants, or materials necessary for their life during transport |                            |
|                                               | Test, inspection, certification and approval procedures                                                                                                        |                            |
| Informational support                         | Search and selection of potential buyers of products                                                                                                           |                            |
|                                               | Development of specialized media resources                                                                                                                     |                            |
| Marketing support                             | Entering new markets                                                                                                                                           |                            |
|                                               | Increasing presence in existing markets; development of e-commerce and electronic trading platforms                                                            |                            |
| Institutional support                         | Collection and accumulation of products of small and medium-sized businesses for promotion in foreign markets                                                  |                            |
| Digitalization of production processes        | Introduction of new technologies                                                                                                                               |                            |
|                                               | Modernization of production facilities                                                                                                                         |                            |
|                                               | Development of digital commerce                                                                                                                                |                            |
|                                               | Education and Science Reform                                                                                                                                   |                            |
|                                               | Availability of highly professional staff                                                                                                                      |                            |
| Other (describe)                              |                                                                                                                                                                |                            |

5) Assess the role of China's New Silk Road program for the socio-economic and industrial development of Kyrgyzstan:

5-1) What impact will the creation of the New Silk Road have on Kyrgyzstan's socio-economic and industrial development?

| <b>Answer options</b>    | <b>Check one of the options</b> |
|--------------------------|---------------------------------|
| Extremely positive       |                                 |
| Positive                 |                                 |
| It won't have any effect |                                 |
| Negative                 |                                 |
| Extremely negative       |                                 |

Your comment:

5-2) What benefits will the creation of the New Silk Road bring to Kyrgyzstan?

| <b>Name</b>                                                               | <b>Degree of influence (1-10)</b> |
|---------------------------------------------------------------------------|-----------------------------------|
| Creation and development of transport and infrastructure:                 |                                   |
| Development of the road network                                           |                                   |
| Development of the railway network                                        |                                   |
| Development of communication systems                                      |                                   |
| Overall                                                                   |                                   |
| Technology Transfer                                                       |                                   |
| Increasing employment of the population, including in transport and trade |                                   |
| Development of foreign trade cooperation                                  |                                   |
| Development of integration processes with neighboring countries           |                                   |
| Creation of new enterprises in the territory of Kyrgyzstan                |                                   |
| Increased cargo security                                                  |                                   |
| Other (please specify)                                                    |                                   |

Your comment:

6) Assess the role of Kyrgyzstan's membership in the WTO:

6-1) How effective is Kyrgyzstan's accession to the WTO for the development of the country's enterprises?

| <b>Enterprises</b>                                                                             | <b>Degree of effectiveness at this time (1-10)</b> | <b>Degree of effectiveness in perspective 2018-2023 (1-10)</b> |
|------------------------------------------------------------------------------------------------|----------------------------------------------------|----------------------------------------------------------------|
| Enterprises - producers and exporters of goods and services                                    |                                                    |                                                                |
| Enterprises - importers of raw materials and other goods and services necessary for production |                                                    |                                                                |

Your comment:

6-2) What factors are currently preventing Kyrgyzstan from taking greater advantage of WTO accession to accelerate the country's socio-economic and industrial development?

| <b>Name</b>                                                                               | <b>Degree of influence (1-10)</b> |
|-------------------------------------------------------------------------------------------|-----------------------------------|
| Small domestic market volume, low income and purchasing power of the population           |                                   |
| Low competitiveness and quality of domestic products                                      |                                   |
| Insufficient development of innovation and new technologies                               |                                   |
| Insufficient pace of reforms in the sphere of technical regulation and customs procedures |                                   |
| High international obligations under the WTO                                              |                                   |
| High share of imported raw materials in production when opening the domestic market       |                                   |
| Difficulties in foreign trade                                                             |                                   |
| Accession to multiple WTO sectoral initiatives that limit domestic market protection      |                                   |
| Weak interest of international investors                                                  |                                   |
| Other (please specify)                                                                    |                                   |

- 7) What conditions for deepening political and economic interaction between the European Union and Kyrgyzstan, in your opinion, are the most significant for the socio-economic and industrial development of the country?

| Name                                                                                                       | Degree of influence (1-10) |
|------------------------------------------------------------------------------------------------------------|----------------------------|
| Development of political dialogue                                                                          |                            |
| Development of democratic reforms in Kyrgyzstan, support for civil society institutions                    |                            |
| Reduction of corruption, development of security and justice                                               |                            |
| Development of cultural and educational ties, technical cooperation                                        |                            |
| Cooperation in the field of sustainable development and green economy                                      |                            |
| Development of trade and economic relations                                                                |                            |
| Opening of new joint ventures                                                                              |                            |
| Creation of favorable conditions for domestic products to enter European markets                           |                            |
| Deepening sectoral cooperation with European countries                                                     |                            |
| Development of financial interaction                                                                       |                            |
| Improving the investment climate in Kyrgyzstan and creating favorable conditions for attracting investment |                            |
| Other (please specify)                                                                                     |                            |

- 8) How does the imposition of mutual sanctions between Russia and the EU affect the attraction of international investment in the Kyrgyz economy?

| Answer options     | Check one of the options |
|--------------------|--------------------------|
| Very positively    |                          |
| Positively         |                          |
| It has no effect   |                          |
| Negative           |                          |
| Extremely negative |                          |

Your comments:
