# Supplementary material for: Impacts of Various Connectivity Processes in Central Asia on Sustainable Development of Kyrgyzstan
Source: MDPI journal article supplement (doi:10.3390/su14126998), 2022-06-08
Supplement: s1 [file s1]

Archive with 1 entries (1 files):
- sustainability-1731574-supplementary.pdf
